# Supplementary material for: Selective Targeting of the Hedgehog Signaling Pathway by PBM Nanoparticles in Docetaxel-Resistant Prostate Cancer
Source: PubMed Central journal article supplement (PMC7563377; doi:10.3390/cells9091976), 2020-08-27
Supplement: cells-09-01976-s001.pdf [file cells-09-01976-s001.pdf]

## Supplementary Information

### Selective targeting of the hedgehog signaling pathway by PBM nanoparticles in docetaxel-resistant prostate cancer

Santosh Kumar Singh <sup>1</sup>, Jennifer B. Gordetsky <sup>2</sup>, Sejong Bae <sup>3</sup>, Edward P. Acosta <sup>4</sup>, James W. Lillard Jr. <sup>1</sup>, and Rajesh Singh <sup>1</sup> \*

#### Affiliations:

<sup>1</sup> Department of Microbiology, Biochemistry and Immunology, Cancer Health Equity Institute, Morehouse School of Medicine, Atlanta, GA, USA, 30310

<sup>2</sup> Departments of Pathology and Urology, Vanderbilt University Medical Center, Nashville, TN USA, 37232

<sup>3</sup> Division of Preventive Medicine, University of Alabama at Birmingham School of medicine, Birmingham, AL, USA, 35205

<sup>4</sup> Department of Pharmacology and Toxicology, University of Alabama at Birmingham, Birmingham, AL, USA, 35294

\* **Corresponding author:** Rajesh Singh, Ph.D., Department of Microbiology, Biochemistry and Immunology, Cancer Health Equity Institute, Morehouse School of Medicine, 720 Westview Drive SW, Atlanta GA 30310, Tel: 404-756-6661, Fax: 404-752-1179, E-mail: [rsingh@msm.edu](mailto:rsingh@msm.edu)

## Supplementary Figure

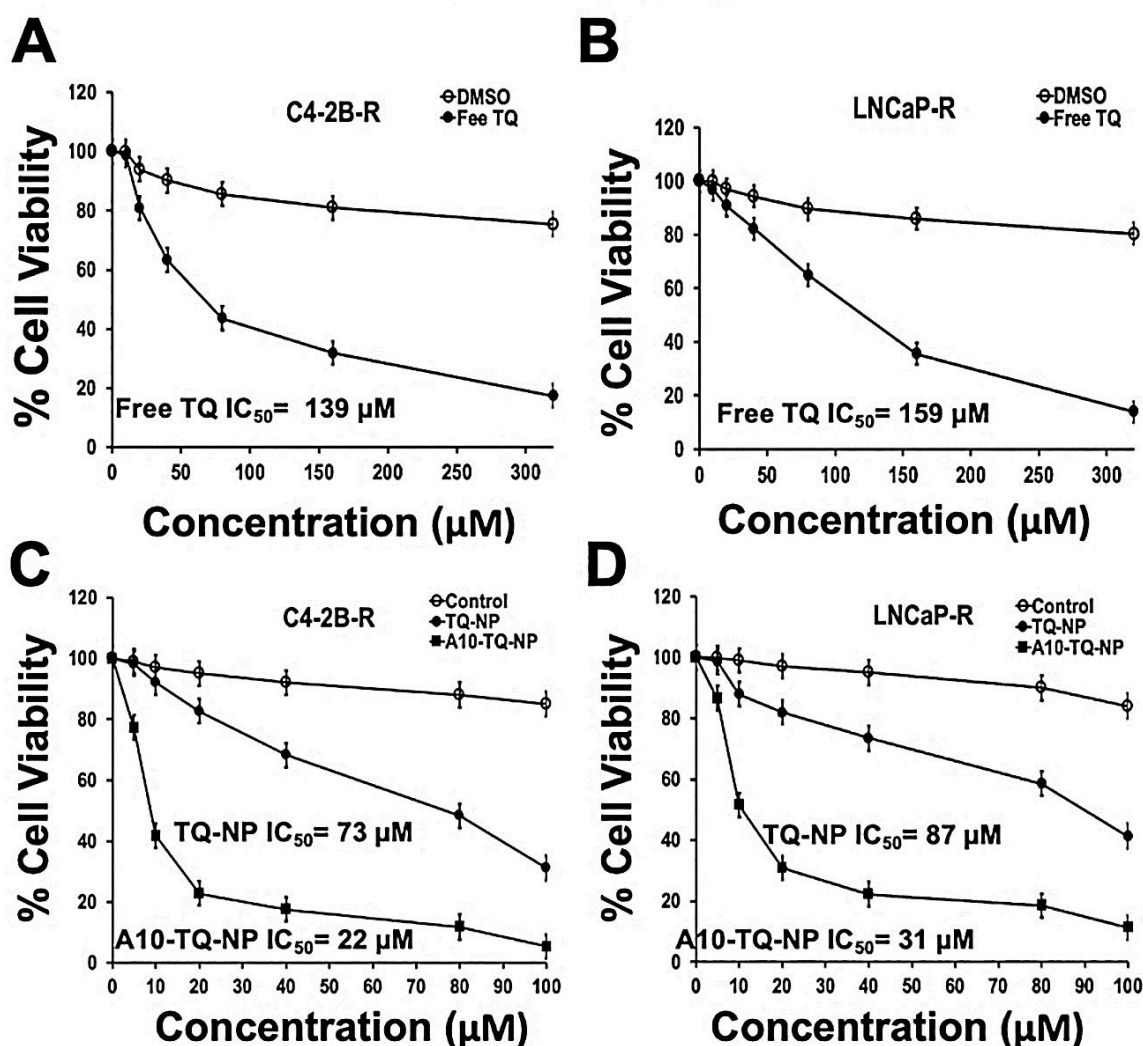

**Figure S1: Thymoquinone induces an anti-proliferative effect on docetaxel resistance to prostate cancer cells.** Docetaxel resistance cells, C4-2B-R and LNCaP-R were grown on 96-well plates for overnight and then treated with sequential dosages of free TQ (10, 20, 40, 80, 160, 320  $\mu\text{M}$ ), and PBM-NPs (TQ-NP, or A10-TQ-NPs; 5, 10, 20, 40, 80, 100  $\mu\text{M}$ ) for 48 h at 37°C in a 5%  $\text{CO}_2$  incubator. Next, the cell viability was measured by MTT assay. The optimal  $\text{IC}_{50}$  values of free TQ, and PBM-NPs (TQ-NP, or A10-TQ-NP) are shown in graphs A, B, C, and D, respectively. Data are represented as a mean  $\pm$  standard error of the mean of at least three independent experiments.

**Figure S2.** Densitometry readings/intensity ratios in C4-2B-R and LNCaP-R immunoblots

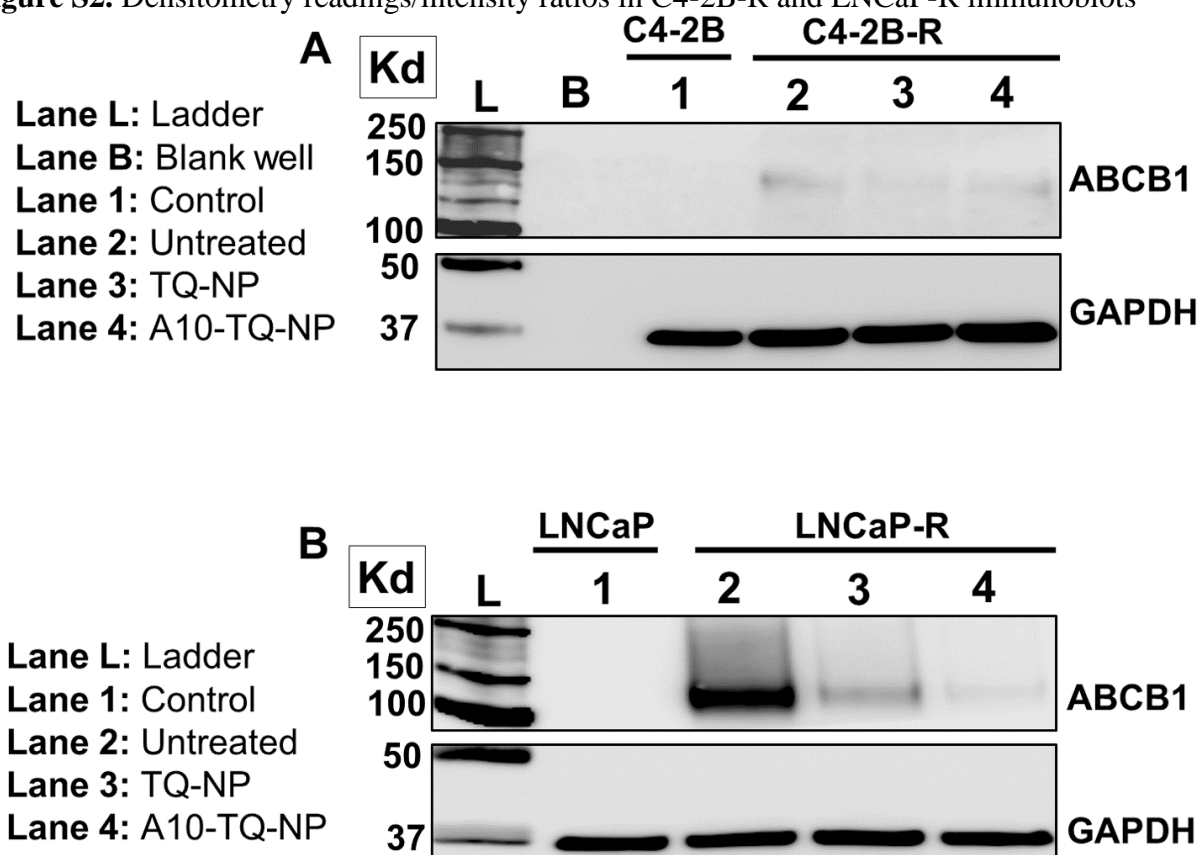

**Table.** Densitometry readings/intensity ratios

|               | ABCB1/GAPDH |
|---------------|-------------|
| C4-2B-Control | 0           |
| C4-2B-R (UT)  | 3.317917    |
| TQ-NP         | 0.59683     |
| A10-TQ-NP     | 0.560444    |

|               | ABCB1/GAPDH |
|---------------|-------------|
| LNCaP-Control | 0           |
| LNCaP-R (UT)  | 3.913951    |
| TQ-NP         | 0.695781    |
| A10-TQ-NP     | 0.137985    |

**Figure S2.** Densitometry readings/intensity ratio of ABCB1 marker in C4-2B-R and LNCaP-R immunoblots. PCa cells (parental control and DTX- resistant cell) were treated with or without A10-conjugated TQ-NPs for 48 h, and ABCB1 (~140KD) protein expression was assessed by Western blots. Tables shows the density intensity ratio of C4-2B-R and LNCaP-R cell lines. GAPDH (37KD) was used as an internal standard for equalizing the samples. The ratios for immunoblot densitometry readings/intensity shown are representative of three independent experiments.

**Figure S3.** Densitometry readings/intensity ratios in C4-2B-R cell line

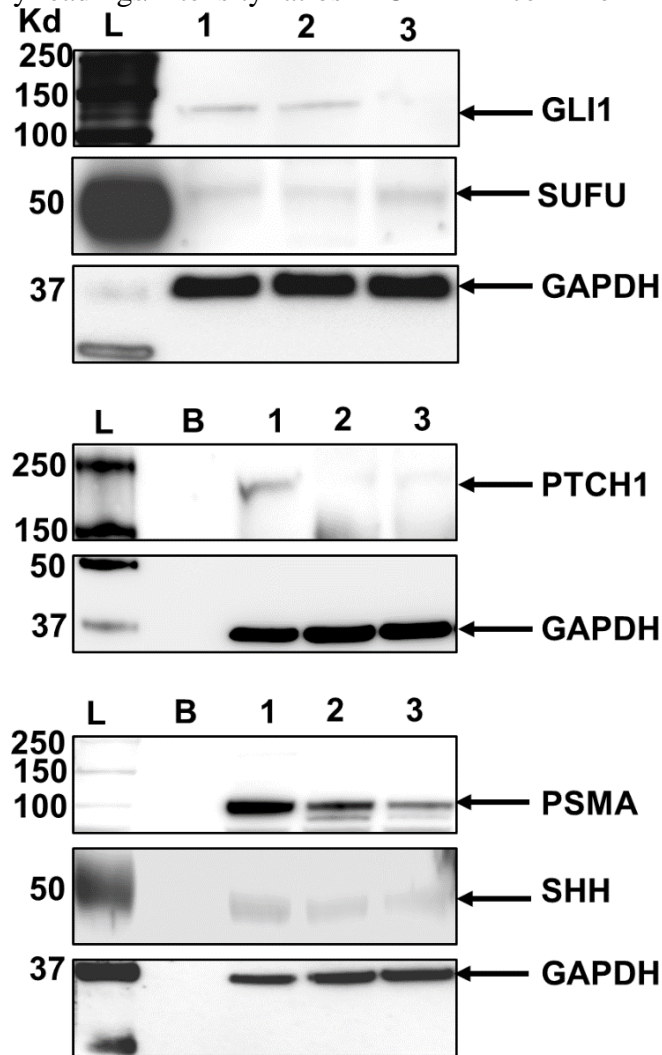

**Lane L:** Ladder  
**Lane B:** Blank well  
**Lane 1:** Untreated  
**Lane 2:** TQ-NP  
**Lane 3:** A10-TQ-NP

| C4-2B-R          |            |           |             |            |            |
|------------------|------------|-----------|-------------|------------|------------|
|                  | PSMA/GAPDH | SHH/GAPDH | PTCH1/GAPDH | GLI1/GAPDH | SUFU/GAPDH |
| <b>UT</b>        | 2.116074   | 1.550368  | 2.396878    | 1.586341   | 0.941512   |
| <b>TQ-NP</b>     | 0.723468   | 0.809105  | 0.349075    | 1.368609   | 0.747718   |
| <b>A10-TQ-NP</b> | 0.137971   | 0.636629  | 0.398266    | 0.06786    | 1.439391   |

**Figure S3.** Densitometry readings/intensity ratios in LNCaP-R cell line

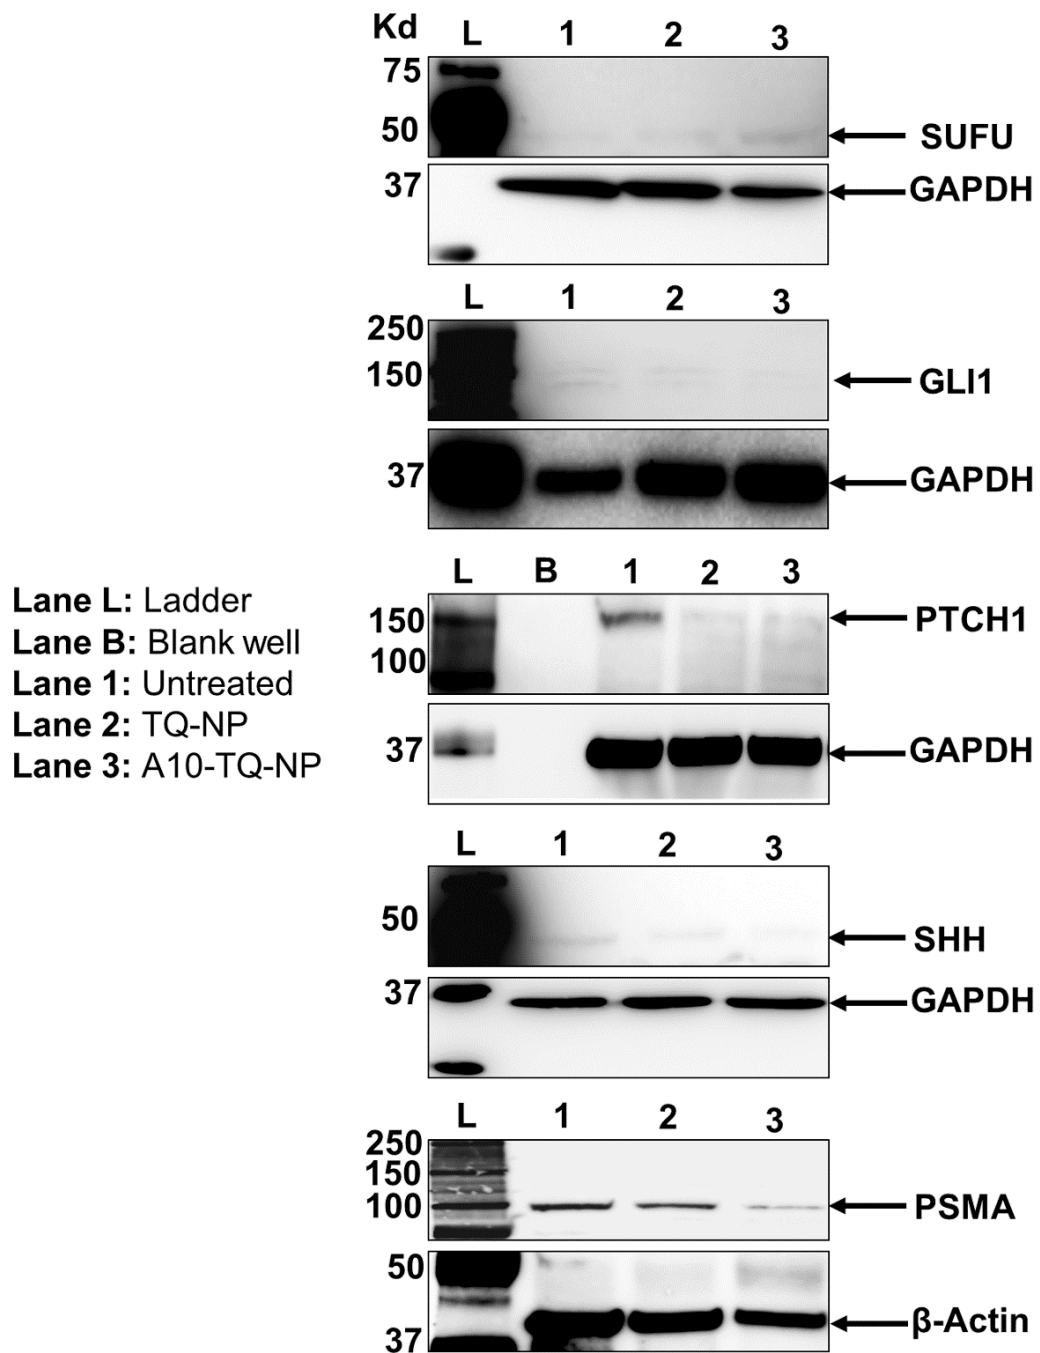

| LNCaP-R          |                      |           |             |            |            |
|------------------|----------------------|-----------|-------------|------------|------------|
|                  | PSMA/ $\beta$ -Actin | SHH/GAPDH | PTCH1/GAPDH | GLI1/GAPDH | SUFU/GAPDH |
| <b>UT</b>        | 1.198227             | 0.921141  | 1.234737    | 0.993969   | 0.126035   |
| <b>TQ-NP</b>     | 1.071506             | 0.54844   | 0.290596    | 0.728331   | 0.44728    |
| <b>A10-TQ-NP</b> | 0.357167             | 0.055435  | 0.258125    | 0.344001   | 2.498563   |

**Figure S3. Densitometry readings/intensity ratio of hedgehog pathways in C4-2B-R and LNCaP-R immunoblots.** DTX-resistant (C4-2B-R and LNCaP-R) PCa cells were treated with or without A10-conjugated TQ-NP for 48 h, and the expression of PSMA(110KD), SHH (45Kd precursor), PTCH1 (180KD), GLI1 (160KD), and SUFU (54KD) proteins were analyzed by Western blots. Table shows the corresponding densitometry reading intensity ratio in C4-2B-R and LNCaP-R cells. GAPDH (37KD) and  $\beta$ -actin (42KD) was used as a loading control. UT: untreated (DTX resistant). The ratios for immunoblot densitometry readings/intensity shown are representative of three independent experiments.

Figure S4. Densitometry readings/intensity ratios of PSMA in PCa cell lines

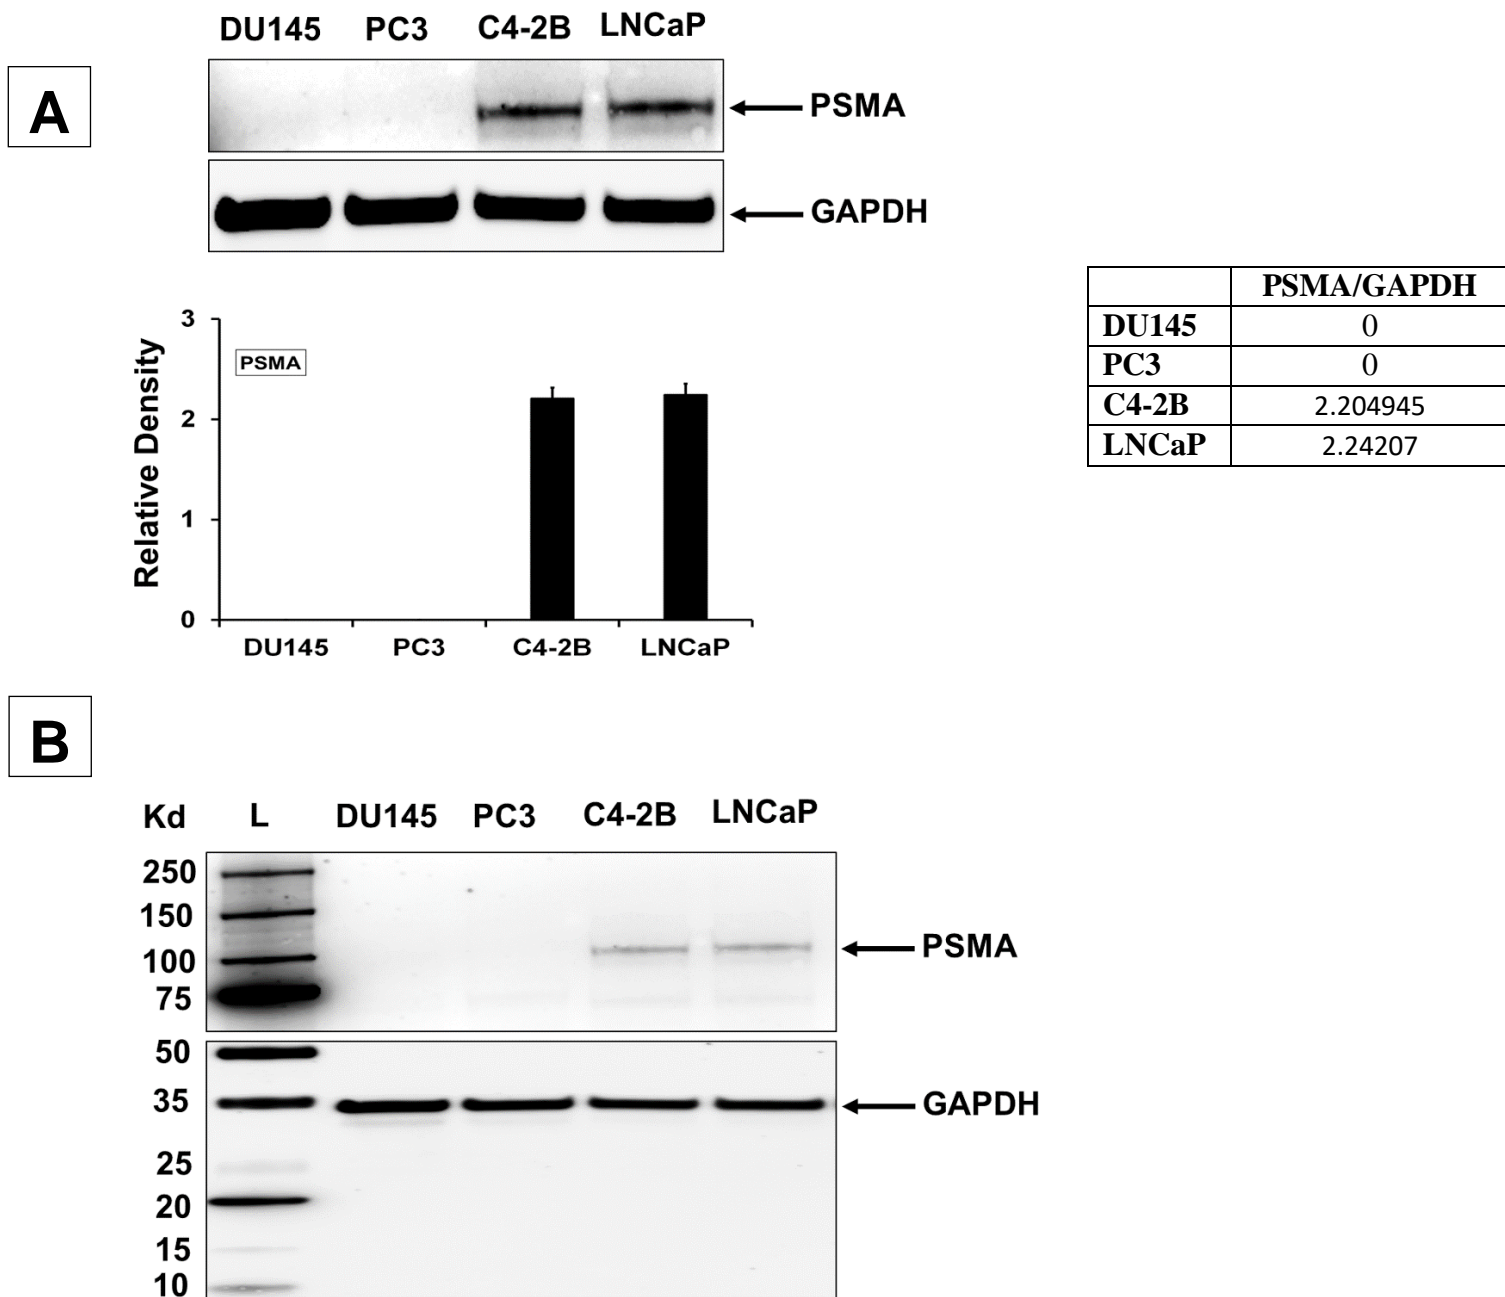

Figure S4. **Densitometry readings/intensity ratio and immunoblots of PSMA expressing PCa cell lines.** (A) Immunoblots shows the expression of PSMA (110KD) protein in untreated PCa cells (DU145, PC3, C4-2B, and LNCaP). Table shows the corresponding densitometry reading intensity ratio. GAPDH (37KD) was used as a loading control. The ratios for immunoblot densitometry readings/intensity shown are representative of three independent experiments. PCa cell lines, PC-3 and DU145, were purchased from American Tissue Culture Collection (ATCC, Manassas, VA, USA) and maintained in RPMI-1640 media supplemented with 10% FBS, nonessential amino acids, HEPES, 2 mM L-glutamine, and penicillin/streptomycin antibiotic solution (Fisher Scientific, USA). (B) Shows the original blot of PSMA and GAPDH proteins expression.
